# Supplementary material for: Dipeptidyl Peptidase 4 Stimulation Induces Adipogenesis-Related Gene Expression of Adipose Stromal Cells
Source: MDPI journal article supplement (doi:10.3390/ijms242216101), 2023-11-08

Dipeptidyl peptidase 4 stimulation induces adipogenesis-related gene expression of adipose stromal cells

Hsiao-Chi Lai<sup>1,2</sup>, Pei-Hsuan Chen<sup>1,2</sup>, Chia-Hua Tang<sup>1</sup>, Lee-Wei Chen<sup>1,2,3\*</sup>

Supplemental Figures

**Supplemental Figure 1:** MCP-1-supplemented control plasma increases the protein expression of adiponectin and DPP4 in SVFs from adipose tissue of *Lepr<sup>db/db</sup>* mice. Uncropped Western blot images of pNF-κB, NF-κB, pJNK, JNK, adiponectin, DPP4 and β-actin of SVFs from adipose tissue of *Lepr<sup>db/db</sup>* mice. Representative images and statistical analysis are presented in Figure 3A.

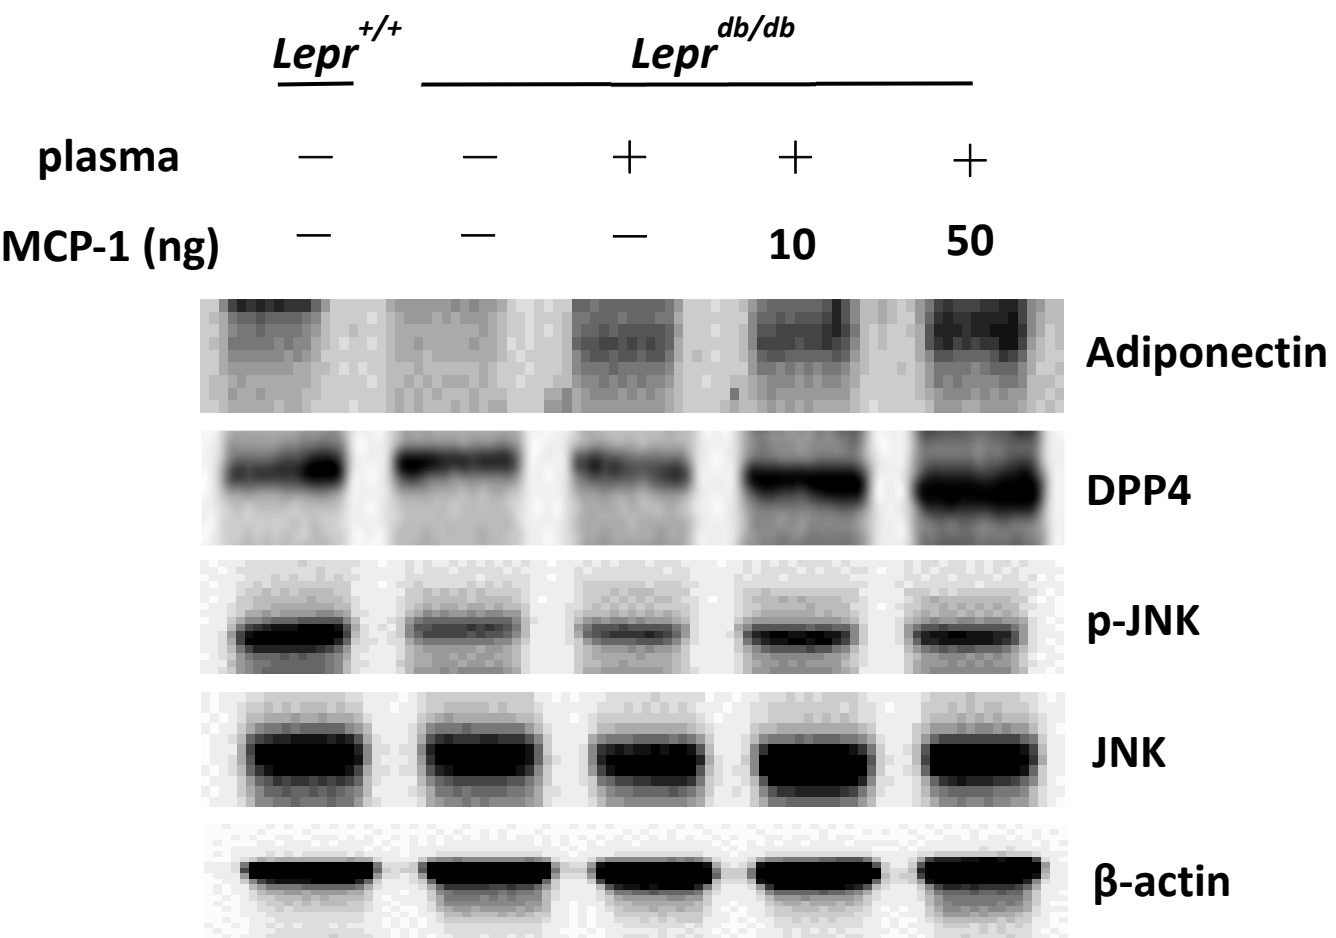

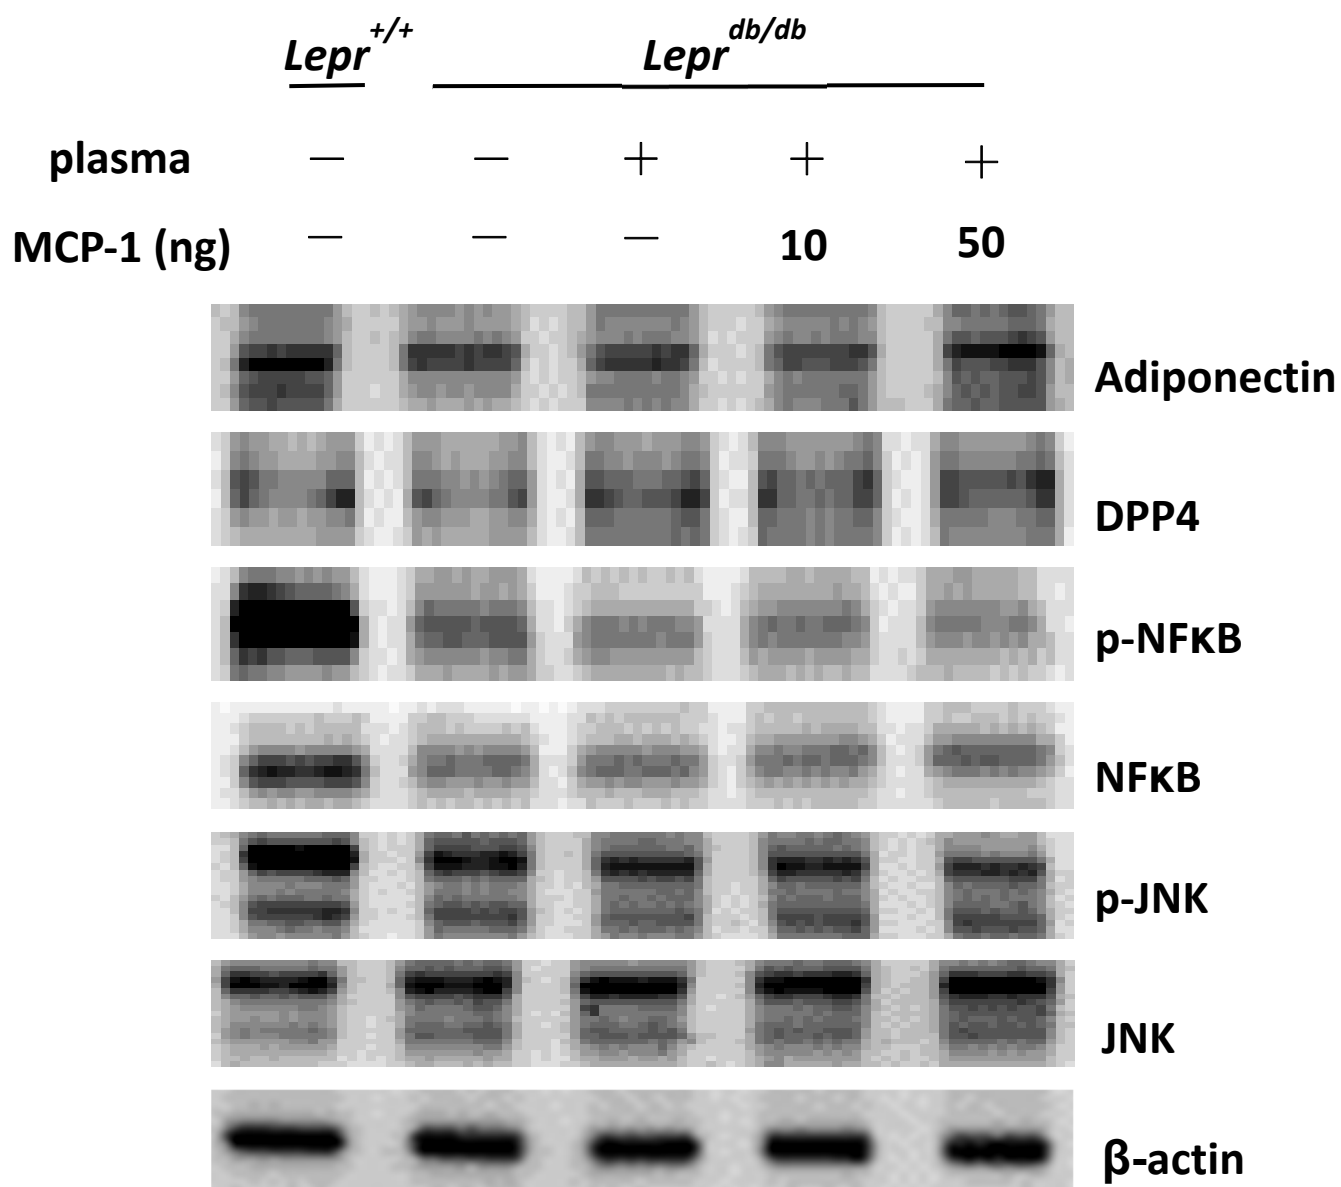

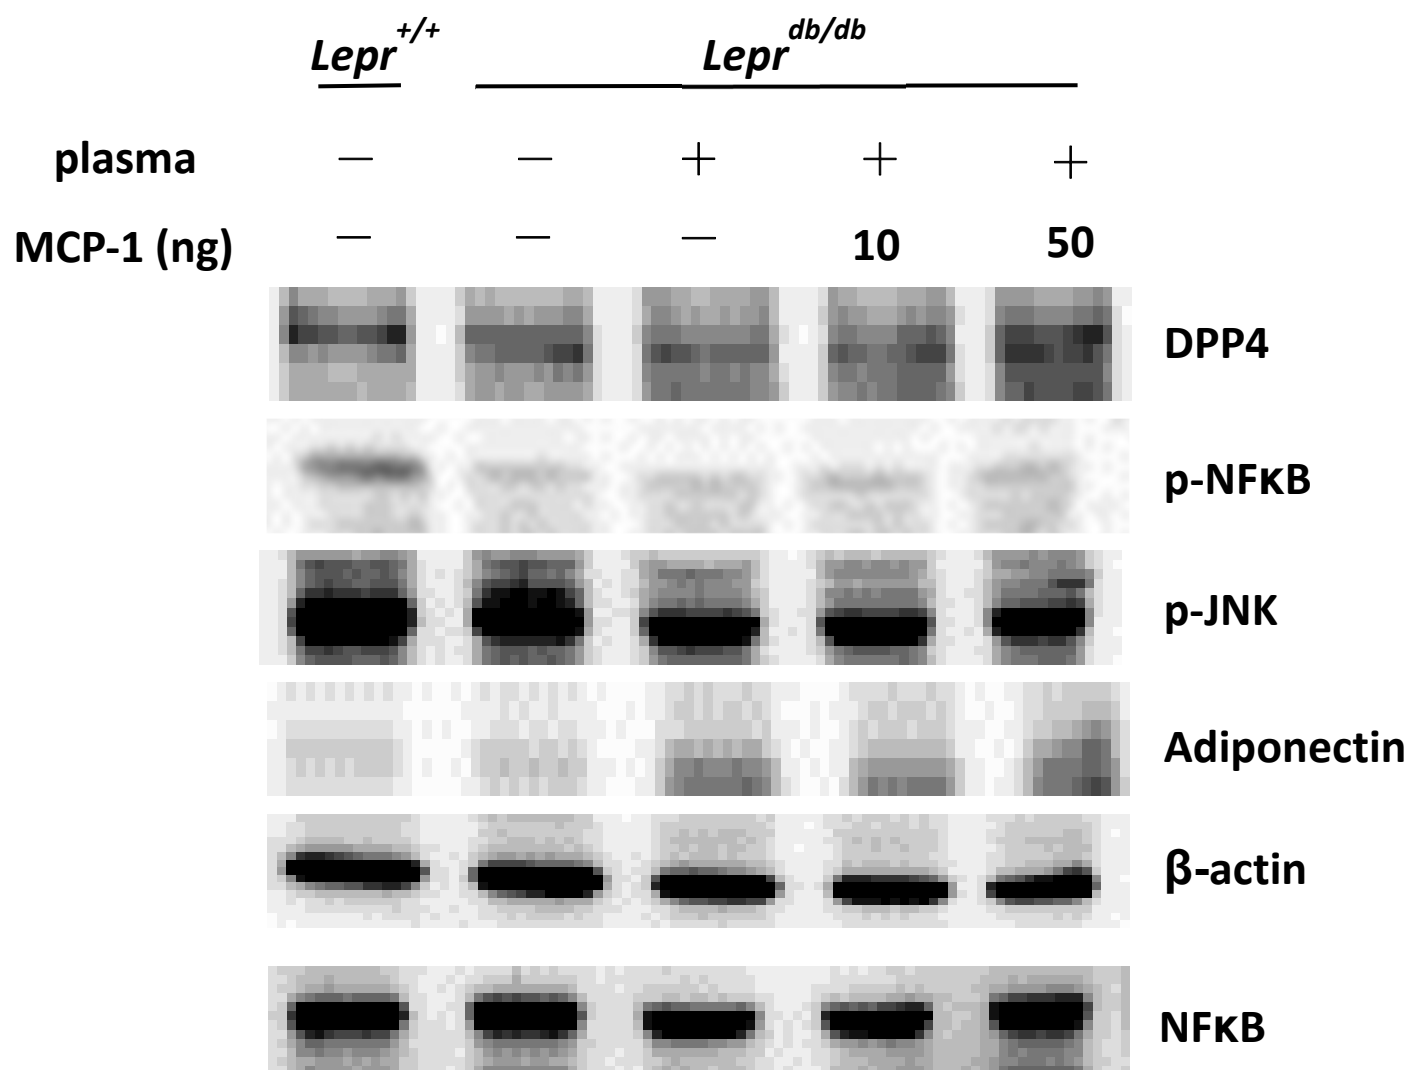

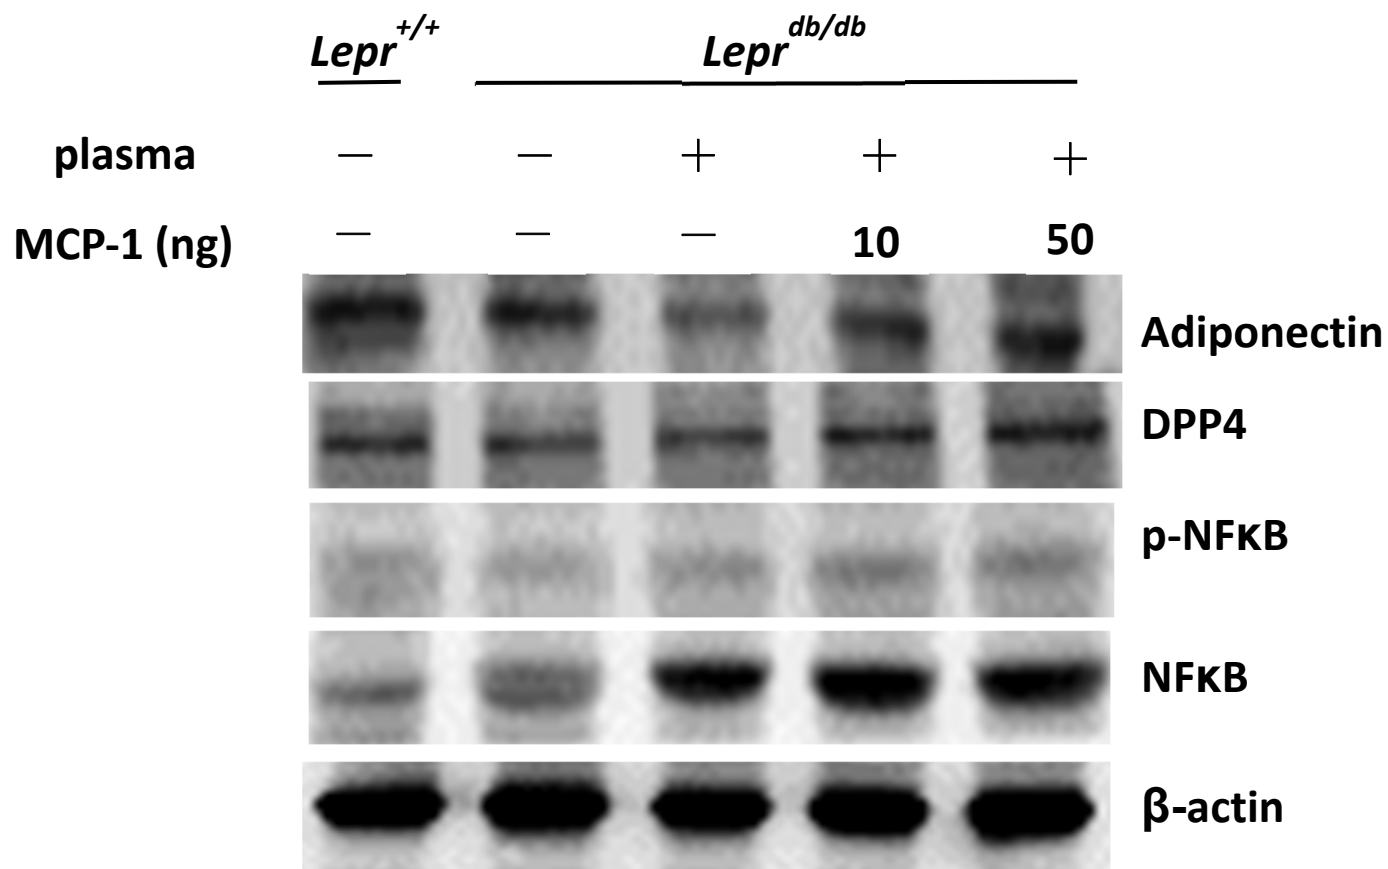

Supplement: s1 [file s1]
